# Supplementary material for: Quantitative Imaging Parameters of Contrast-Enhanced Micro-Computed Tomography Correlate with Angiogenesis and Necrosis in a Subcutaneous C6 Glioma Model
Source: Cancers (Basel). 2020 Nov 18;12(11):3417. doi: 10.3390/cancers12113417 (PMC7698719; doi:10.3390/cancers12113417)
Supplement: Supplementary file 1 [file cancers-12-03417-s001.pdf]

# Supplementary Materials: Quantitative Imaging Parameters of Contrast-Enhanced Micro-Computed Tomography Correlate with Angiogenesis and Necrosis in a Subcutaneous C6 Glioma Model

Lízbeth Ayala-Domínguez, Enrique Pérez-Cárdenas, Alejandro Avilés-Salas, Luis Alberto Medina, Marcela Lizano and María-Ester Brandan

**Figure S1.** Representative histological samples of the subcutaneous C6 glioma model evaluated with the SE imaging protocol.

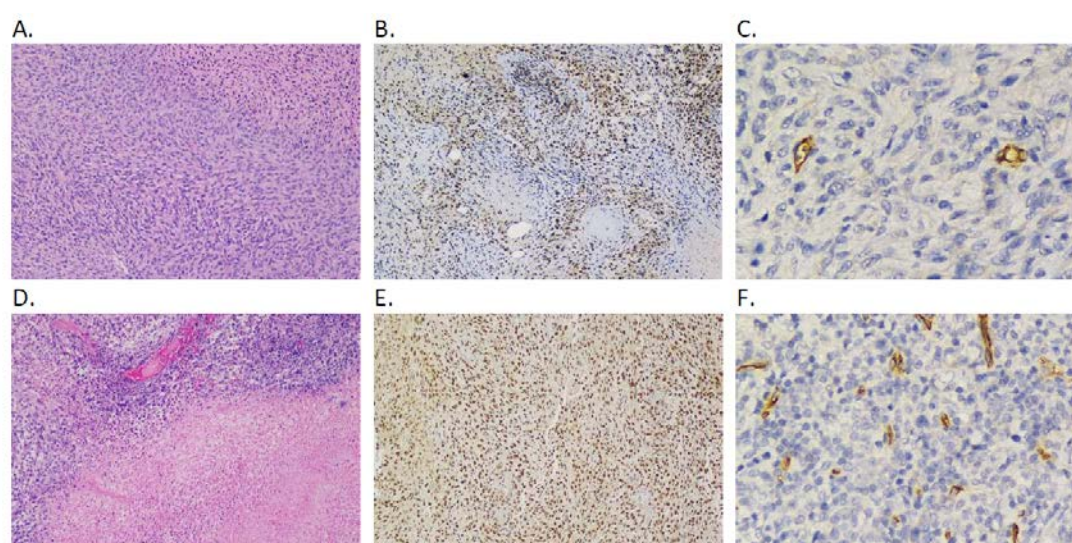

For this group, the lowest percent necrosis (PN) was (A) 5% and the highest was (B) 85%; the lowest proliferation index (PI) was (C) 40%, and the highest was (D) 95%; the lowest microvessel density (MVD) was (E) 2.0 vessels/high-power field (HPF), and the highest was (F) 18.3 vessels/HPF. MVD images are shown at 400× magnification, all other images are shown at 100× magnification.

**Figure S2.** Representative histological samples of the subcutaneous C6 glioma model evaluated with the DE imaging protocol.

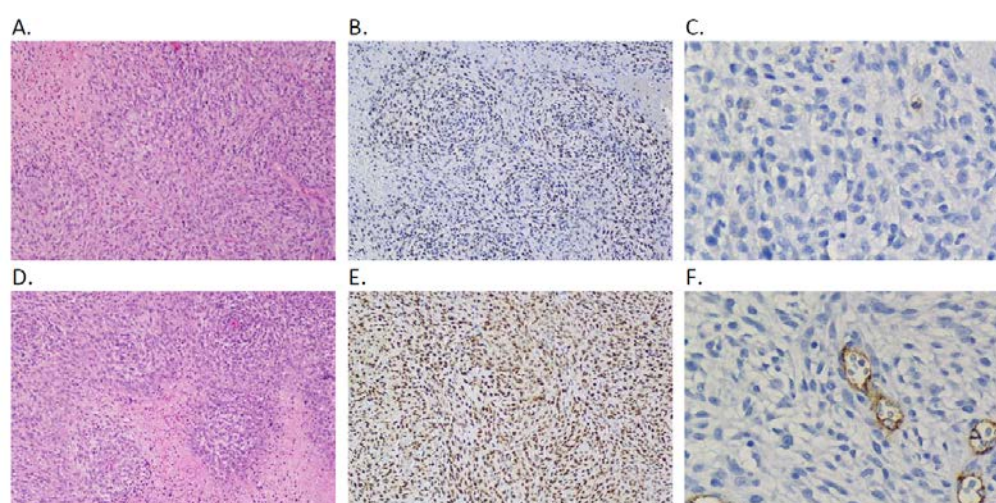

For this group, the lowest PN was (A) 15% and the highest was (B) 60%; the lowest PI was (C) 50%, and the highest was (D) 95%; the lowest MVD was (E) 0.9 vessels/field of view (FOV), and the highest was (F) 7.6 vessels/HPF. MVD images are shown at 400× magnification, all other images are shown at 100× magnification.

**Figure S3.** Representative histological samples of the subcutaneous C6 glioma model evaluated with the DCE imaging protocol.

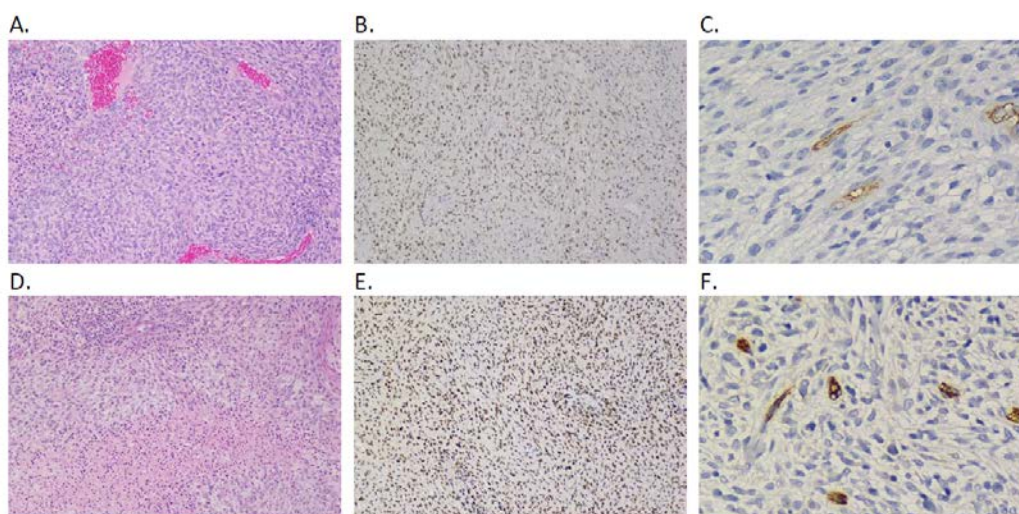

For this group, the lowest PN was (A) 5% and the highest was (B) 50%; the lowest PI was (C) 60%, and the highest was (D) 90%; the lowest MVD was (E) 1.3 vessels/field of view (FOV), and the highest was (F) 6.3 vessels/HPF. MVD images are shown at 400× magnification, all other images are shown at 100× magnification.

**Table S1.** Average VOI size and estimated number of pixels used for the quantification of imaging parameters for several tissue/organs in SE and DE micro-CT images.

| Tissue/Organ     | SE Imaging Protocol       |                            | DE Imaging Protocol       |                            |
|------------------|---------------------------|----------------------------|---------------------------|----------------------------|
|                  | Volume (mm <sup>3</sup> ) | Estimated Number of Voxels | Volume (mm <sup>3</sup> ) | Estimated Number of Voxels |
| Abdominal aorta  | 0.5 ± 0.0                 | 713.3 ± 6.1                | 0.5 ± 0.0                 | 719.0 ± 4.2                |
| IVC              | 1.8 ± 0.0                 | 2191.0 ± 2.8               | 1.8 ± 0.0                 | 2196.5 ± 26.2              |
| Kidney           | 0.5 ± 0.0                 | 717.5 ± 3.5                | 0.5 ± 0.0                 | 721.0 ± 2.8                |
| Liver            | 1.8 ± 0.0                 | 2188.0 ± 2.8               | 1.8 ± 0.0                 | 2185 ± 4.9                 |
| Spleen           | 0.5 ± 0.0                 | 716.3 ± 5.5                | 0.5 ± 0.0                 | 721.0 ± 4.2                |
| Muscle           | 0.5 ± 0.0                 | 718.8 ± 6.1                | 0.5 ± 0.0                 | 723.5 ± 4.9                |
| Complete tumor   | 334.2 ± 126.8             | 349,180.5 ± 130,381.6      | 694.3 ± 94.8              | 718,005.3 ± 96,071.6       |
| Central tumor    | 41.8 ± 15.8               | 45,570.3 ± 16,752.2        | 86.8 ± 11.9               | 92,762.5 ± 12,123.8        |
| Peripheral tumor | 2.0 ± 1.1                 | 2400.3 ± 1308.5            | 1.8 ± 1.6                 | 2135.9 ± 1834.0            |

Values are expressed as mean ± standard deviation.

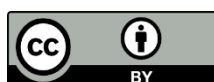

© 2020 by the authors. Licensee MDPI, Basel, Switzerland. This article is an open access article distributed under the terms and conditions of the Creative Commons Attribution (CC BY) license (<http://creativecommons.org/licenses/by/4.0/>).
